# Supplementary material
Source: PubMed Central journal article supplement (PMC4097863)
Supplement: NIHMS531646-supplement-01.pdf [file NIHMS531646-supplement-01.pdf]

## Supplementary Table

Sample information in this study.

|    | Sample type | Sample_description   | in house/ GEO | GEO_accession No. | GSE_accession No. |
|----|-------------|----------------------|---------------|-------------------|-------------------|
| 1  | Blood       | Lymphocyte           | GEO           | GSM141552         | GSE6088           |
| 2  | Blood       | Lymphocyte           | GEO           | GSM141553         | GSE6088           |
| 3  | Blood       | Lymphocyte           | GEO           | GSM141554         | GSE6088           |
| 4  | Blood       | Lymphocyte           | GEO           | GSM141555         | GSE6088           |
| 5  | Blood       | Lymphocyte           | GEO           | GSM217766         | GSE8762           |
| 6  | Blood       | Lymphocyte           | GEO           | GSM217767         | GSE8762           |
| 7  | Blood       | Lymphocyte           | GEO           | GSM217768         | GSE8762           |
| 8  | Blood       | Lymphocyte           | GEO           | GSM217769         | GSE8762           |
| 9  | Blood       | Lymphocyte           | GEO           | GSM674835         | GSE27291          |
| 10 | Blood       | Lymphocyte           | GEO           | GSM674838         | GSE27291          |
| 11 | Blood       | Lymphocyte           | GEO           | GSM674841         | GSE27291          |
| 12 | Blood       | Lymphocyte           | GEO           | GSM674844         | GSE27291          |
| 13 | Blood       | Lymphoblasts         | GEO           | GSM505297         | GSE20153          |
| 14 | Blood       | Lymphoblasts         | GEO           | GSM505298         | GSE20153          |
| 15 | Blood       | Lymphoblasts         | GEO           | GSM505299         | GSE20153          |
| 16 | Blood       | Lymphoblasts         | GEO           | GSM505300         | GSE20153          |
| 17 | Blood       | Lymphoblasts         | GEO           | GSM505301         | GSE20153          |
| 18 | Blood       | Lymphoblasts         | GEO           | GSM505302         | GSE20153          |
| 19 | Blood       | Lymphoblasts         | GEO           | GSM505332         | GSE20153          |
| 20 | Blood       | Lymphoblasts         | GEO           | GSM505618         | GSE20153          |
| 21 | Adult Brain | superiorfrontalgyrus | GEO           | GSM119666         | GSE5281           |
| 22 | Adult Brain | superiorfrontalgyrus | GEO           | GSM119667         | GSE5281           |
| 23 | Adult Brain | superiorfrontalgyrus | GEO           | GSM119668         | GSE5281           |
| 24 | Adult Brain | superiorfrontalgyrus | GEO           | GSM119669         | GSE5281           |
| 25 | Adult Brain | superiorfrontalgyrus | GEO           | GSM119670         | GSE5281           |
| 26 | Adult Brain | superiorfrontalgyrus | GEO           | GSM119671         | GSE5281           |
| 27 | Adult Brain | superiorfrontalgyrus | GEO           | GSM119672         | GSE5281           |
| 28 | Adult Brain | superiorfrontalgyrus | GEO           | GSM119673         | GSE5281           |
| 29 | Adult Brain | superiorfrontalgyrus | GEO           | GSM119674         | GSE5281           |
| 30 | Adult Brain | superiorfrontalgyrus | GEO           | GSM119675         | GSE5281           |
| 31 | Adult Brain | superiorfrontalgyrus | GEO           | GSM119676         | GSE5281           |
| 32 | Adult Brain | amygdala             | GEO           | GSM175842         | GSE7307           |
| 33 | Adult Brain | amygdala             | GEO           | GSM175843         | GSE7307           |
| 34 | Adult Brain | amygdala             | GEO           | GSM175844         | GSE7307           |
| 35 | Adult Brain | amygdala             | GEO           | GSM175845         | GSE7307           |
| 36 | Adult Brain | cerebellum           | GEO           | GSM175852         | GSE7307           |
| 37 | Adult Brain | cerebellum           | GEO           | GSM175853         | GSE7307           |
| 38 | Adult Brain | cerebellum           | GEO           | GSM175854         | GSE7307           |
| 39 | Adult Brain | corpus_callosum      | GEO           | GSM175855         | GSE7307           |
| 40 | Adult Brain | corpus_callosum      | GEO           | GSM175856         | GSE7307           |

|    |             |                  |     |           |         |
|----|-------------|------------------|-----|-----------|---------|
| 41 | Adult Brain | corpus_callosum  | GEO | GSM175857 | GSE7307 |
| 42 | Adult Brain | corpus_callosum  | GEO | GSM175858 | GSE7307 |
| 43 | Adult Brain | frontal_lobe     | GEO | GSM175859 | GSE7307 |
| 44 | Adult Brain | frontal_lobe     | GEO | GSM175860 | GSE7307 |
| 45 | Adult Brain | hippocampus      | GEO | GSM175861 | GSE7307 |
| 46 | Adult Brain | substantia_nigra | GEO | GSM175871 | GSE7307 |
| 47 | Adult Brain | substantia_nigra | GEO | GSM175872 | GSE7307 |
| 48 | Adult Brain | substantia_nigra | GEO | GSM175873 | GSE7307 |
| 49 | Adult Brain | cerebellum       | GEO | GSM175907 | GSE7307 |
| 50 | Adult Brain | hippocampus      | GEO | GSM175987 | GSE7307 |
| 51 | Adult Brain | hippocampus      | GEO | GSM175988 | GSE7307 |
| 52 | Adult Brain | frontal_lobe     | GEO | GSM176017 | GSE7307 |
| 53 | Adult Brain | amygdala         | GEO | GSM176045 | GSE7307 |
| 54 | Adult Brain | cerebellum       | GEO | GSM176048 | GSE7307 |
| 55 | Adult Brain | cerebral_cortex  | GEO | GSM176049 | GSE7307 |
| 56 | Adult Brain | corpus_callosum  | GEO | GSM176050 | GSE7307 |
| 57 | Adult Brain | frontal_lobe     | GEO | GSM176051 | GSE7307 |
| 58 | Adult Brain | hippocampus      | GEO | GSM176052 | GSE7307 |
| 59 | Adult Brain | substantia_nigra | GEO | GSM176059 | GSE7307 |
| 60 | Adult Brain | hypothalamus     | GEO | GSM176067 | GSE7307 |
| 61 | Adult Brain | hypothalamus     | GEO | GSM176116 | GSE7307 |
| 62 | Adult Brain | frontal_lobe     | GEO | GSM176120 | GSE7307 |
| 63 | Adult Brain | substantia_nigra | GEO | GSM176125 | GSE7307 |
| 64 | Adult Brain | amygdala         | GEO | GSM176147 | GSE7307 |
| 65 | Adult Brain | amygdala         | GEO | GSM176148 | GSE7307 |
| 66 | Adult Brain | amygdala         | GEO | GSM176149 | GSE7307 |
| 67 | Adult Brain | cerebellum       | GEO | GSM176157 | GSE7307 |
| 68 | Adult Brain | cerebellum       | GEO | GSM176158 | GSE7307 |
| 69 | Adult Brain | cerebellum       | GEO | GSM176159 | GSE7307 |
| 70 | Adult Brain | cerebellum       | GEO | GSM176160 | GSE7307 |
| 71 | Adult Brain | cerebral_cortex  | GEO | GSM176161 | GSE7307 |
| 72 | Adult Brain | cerebral_cortex  | GEO | GSM176162 | GSE7307 |
| 73 | Adult Brain | cerebral_cortex  | GEO | GSM176163 | GSE7307 |
| 74 | Adult Brain | cerebral_cortex  | GEO | GSM176164 | GSE7307 |
| 75 | Adult Brain | corpus_callosum  | GEO | GSM176165 | GSE7307 |
| 76 | Adult Brain | corpus_callosum  | GEO | GSM176166 | GSE7307 |
| 77 | Adult Brain | corpus_callosum  | GEO | GSM176167 | GSE7307 |
| 78 | Adult Brain | corpus_callosum  | GEO | GSM176168 | GSE7307 |
| 79 | Adult Brain | frontal_lobe     | GEO | GSM176170 | GSE7307 |
| 80 | Adult Brain | frontal_lobe     | GEO | GSM176171 | GSE7307 |
| 81 | Adult Brain | frontal_lobe     | GEO | GSM176172 | GSE7307 |
| 82 | Adult Brain | frontal_lobe     | GEO | GSM176173 | GSE7307 |
| 83 | Adult Brain | hippocampus      | GEO | GSM176174 | GSE7307 |
| 84 | Adult Brain | hippocampus      | GEO | GSM176175 | GSE7307 |
| 85 | Adult Brain | hippocampus      | GEO | GSM176176 | GSE7307 |

|     |             |                      |     |           |          |
|-----|-------------|----------------------|-----|-----------|----------|
| 86  | Adult Brain | hippocampus          | GEO | GSM176177 | GSE7307  |
| 87  | Adult Brain | substantia_nigra     | GEO | GSM176212 | GSE7307  |
| 88  | Adult Brain | substantia_nigra     | GEO | GSM176213 | GSE7307  |
| 89  | Adult Brain | hypothalamus         | GEO | GSM176226 | GSE7307  |
| 90  | Adult Brain | hypothalamus         | GEO | GSM176233 | GSE7307  |
| 91  | Adult Brain | cerebral_cortex      | GEO | GSM176344 | GSE7307  |
| 92  | Adult Brain | cerebral_cortex      | GEO | GSM176345 | GSE7307  |
| 93  | Adult Brain | cerebral_cortex      | GEO | GSM176346 | GSE7307  |
| 94  | Adult Brain | cerebral_cortex      | GEO | GSM176347 | GSE7307  |
| 95  | Adult Brain | caudate              | GEO | GSM176363 | GSE7307  |
| 96  | Adult Brain | caudate              | GEO | GSM176365 | GSE7307  |
| 97  | Adult Brain | caudate              | GEO | GSM176369 | GSE7307  |
| 98  | Adult Brain | caudate              | GEO | GSM176372 | GSE7307  |
| 99  | Adult Brain | hypothalamus         | GEO | GSM176381 | GSE7307  |
| 100 | Adult Brain | hypothalamus         | GEO | GSM176382 | GSE7307  |
| 101 | Adult Brain | hypothalamus         | GEO | GSM176383 | GSE7307  |
| 102 | Adult Brain | hypothalamus         | GEO | GSM176384 | GSE7307  |
| 103 | Adult Brain | hippocampus          | GEO | GSM300219 | GSE11882 |
| 104 | Adult Brain | superiorfrontalgyrus | GEO | GSM300221 | GSE11882 |
| 105 | Adult Brain | hippocampus          | GEO | GSM300231 | GSE11882 |
| 106 | Adult Brain | entorhinalcortex     | GEO | GSM300252 | GSE11882 |
| 107 | Adult Brain | hippocampus          | GEO | GSM300272 | GSE11882 |
| 108 | Adult Brain | superiorfrontalgyrus | GEO | GSM300274 | GSE11882 |
| 109 | Adult Brain | entorhinalcortex     | GEO | GSM300275 | GSE11882 |
| 110 | Adult Brain | entorhinalcortex     | GEO | GSM300279 | GSE11882 |
| 111 | Adult Brain | superiorfrontalgyrus | GEO | GSM300284 | GSE11882 |
| 112 | Adult Brain | hippocampus          | GEO | GSM300298 | GSE11882 |
| 113 | Adult Brain | superiorfrontalgyrus | GEO | GSM300299 | GSE11882 |
| 114 | Adult Brain | entorhinalcortex     | GEO | GSM300300 | GSE11882 |
| 115 | Adult Brain | entorhinalcortex     | GEO | GSM300308 | GSE11882 |
| 116 | Adult Brain | cortex               | GEO | GSM596843 | GSE24265 |
| 117 | Adult Brain | cortex               | GEO | GSM596846 | GSE24265 |
| 118 | Adult Brain | cortex               | GEO | GSM596849 | GSE24265 |
| 119 | Adult Brain | cortex               | GEO | GSM596851 | GSE24265 |
| 120 | Adult Brain | cerebellum           | GEO | GSM92460  | GSE4036  |
| 121 | Adult Brain | cerebellum           | GEO | GSM92461  | GSE4036  |
| 122 | Adult Brain | cerebellum           | GEO | GSM92462  | GSE4036  |
| 123 | Adult Brain | cerebellum           | GEO | GSM92463  | GSE4036  |
| 124 | Adult Brain | cerebellum           | GEO | GSM92464  | GSE4036  |
| 125 | Fetal Brain | Fetal cortex         | GEO | GSM543630 | GSE21858 |
| 126 | Fetal Brain | Fetal cortex         | GEO | GSM543631 | GSE21858 |
| 127 | Fetal Brain | Fetal cortex         | GEO | GSM543632 | GSE21858 |
| 128 | Fetal Brain | Fetal cortex         | GEO | GSM543633 | GSE21858 |
| 129 | Fetal Brain | Fetal cortex         | GEO | GSM543634 | GSE21858 |
| 130 | Fetal Brain | Fetal cortex         | GEO | GSM543635 | GSE21858 |

|     |             |              |     |           |          |
|-----|-------------|--------------|-----|-----------|----------|
| 131 | Fetal Brain | Fetal cortex | GEO | GSM543636 | GSE21858 |
| 132 | Fetal Brain | Fetal cortex | GEO | GSM543637 | GSE21858 |
| 133 | Fetal Brain | Fetal cortex | GEO | GSM578392 | GSE23579 |
| 134 | Fetal Brain | Fetal cortex | GEO | GSM578399 | GSE23579 |
| 135 | Stem cell   | ES cell      | GEO | GSM172874 | GSE7214  |
| 136 | Stem cell   | ES cell      | GEO | GSM172875 | GSE7214  |
| 137 | Stem cell   | ES cell      | GEO | GSM172876 | GSE7214  |
| 138 | Stem cell   | ES cell      | GEO | GSM172877 | GSE7214  |
| 139 | Stem cell   | ES cell      | GEO | GSM172878 | GSE7214  |
| 140 | Stem cell   | ES cell      | GEO | GSM172879 | GSE7214  |
| 141 | Stem cell   | ES cell      | GEO | GSM172880 | GSE7214  |
| 142 | Stem cell   | ES cell      | GEO | GSM172881 | GSE7214  |
| 143 | Stem cell   | ES cell      | GEO | GSM172882 | GSE7214  |
| 144 | Stem cell   | ES cell      | GEO | GSM347921 | GSE13828 |
| 145 | Stem cell   | ES cell      | GEO | GSM347922 | GSE13828 |
| 146 | Stem cell   | ES cell      | GEO | GSM347923 | GSE13828 |
| 147 | Stem cell   | ES cell      | GEO | GSM347924 | GSE13828 |
| 148 | Stem cell   | ES cell      | GEO | GSM347925 | GSE13828 |
| 149 | Stem cell   | ES cell      | GEO | GSM367061 | GSE14711 |
| 150 | Stem cell   | ES cell      | GEO | GSM367062 | GSE14711 |
| 151 | Stem cell   | ES cell      | GEO | GSM462819 | GSE18618 |
| 152 | Stem cell   | ES cell      | GEO | GSM462820 | GSE18618 |
| 153 | Stem cell   | ES cell      | GEO | GSM462821 | GSE18618 |
| 154 | Stem cell   | ES cell      | GEO | GSM482072 | GSE18618 |
| 155 | Stem cell   | ES cell      | GEO | GSM482073 | GSE18618 |
| 156 | Stem cell   | ES cell      | GEO | GSM482074 | GSE18618 |
| 157 | Stem cell   | ES cell      | GEO | GSM748367 | GSE30220 |
| 158 | Stem cell   | ES cell      | GEO | GSM748368 | GSE30220 |
| 159 | Stem cell   | ES cell      | GEO | GSM748369 | GSE30220 |
| 160 | Stem cell   | iPS cell     | GEO | GSM347916 | GSE13828 |
| 161 | Stem cell   | iPS cell     | GEO | GSM347917 | GSE13828 |
| 162 | Stem cell   | iPS cell     | GEO | GSM347918 | GSE13828 |
| 163 | Stem cell   | iPS cell     | GEO | GSM367243 | GSE14711 |
| 164 | Stem cell   | iPS cell     | GEO | GSM367244 | GSE14711 |
| 165 | Stem cell   | iPS cell     | GEO | GSM367245 | GSE14711 |
| 166 | Stem cell   | iPS cell     | GEO | GSM367258 | GSE14711 |
| 167 | Stem cell   | iPS cell     | GEO | GSM462813 | GSE18618 |
| 168 | Stem cell   | iPS cell     | GEO | GSM462814 | GSE18618 |
| 169 | Stem cell   | iPS cell     | GEO | GSM462815 | GSE18618 |
| 170 | Stem cell   | iPS cell     | GEO | GSM462816 | GSE18618 |
| 171 | Stem cell   | iPS cell     | GEO | GSM462817 | GSE18618 |
| 172 | Stem cell   | iPS cell     | GEO | GSM462818 | GSE18618 |
| 173 | Stem cell   | MSC          | GEO | GSM172856 | GSE7214  |
| 174 | Stem cell   | MSC          | GEO | GSM172857 | GSE7214  |
| 175 | Stem cell   | MSC          | GEO | GSM172858 | GSE7214  |

|     |           |                   |          |           |          |
|-----|-----------|-------------------|----------|-----------|----------|
| 176 | Stem cell | MSC               | GEO      | GSM172859 | GSE7214  |
| 177 | Stem cell | MSC               | GEO      | GSM172860 | GSE7214  |
| 178 | Stem cell | MSC               | GEO      | GSM172861 | GSE7214  |
| 179 | Stem cell | MSC               | GEO      | GSM172862 | GSE7214  |
| 180 | Stem cell | MSC               | GEO      | GSM172863 | GSE7214  |
| 181 | Stem cell | MSC               | GEO      | GSM172864 | GSE7214  |
| 182 | Stem cell | NPC(ES/iPS)       | GEO      | GSM172865 | GSE7214  |
| 183 | Stem cell | NPC(ES/iPS)       | GEO      | GSM172866 | GSE7214  |
| 184 | Stem cell | NPC(ES/iPS)       | GEO      | GSM172867 | GSE7214  |
| 185 | Stem cell | NPC(ES/iPS)       | GEO      | GSM172868 | GSE7214  |
| 186 | Stem cell | NPC(ES/iPS)       | GEO      | GSM172869 | GSE7214  |
| 187 | Stem cell | NPC(ES/iPS)       | GEO      | GSM172870 | GSE7214  |
| 188 | Stem cell | NPC(ES/iPS)       | GEO      | GSM172871 | GSE7214  |
| 189 | Stem cell | NPC(ES/iPS)       | GEO      | GSM172872 | GSE7214  |
| 190 | Stem cell | NPC(ES/iPS)       | GEO      | GSM172873 | GSE7214  |
| 191 | Stem cell | NPC(fetal cortex) | GEO      | GSM335938 | GSE13307 |
| 192 | Stem cell | NPC(fetal cortex) | GEO      | GSM335941 | GSE13307 |
| 193 | Stem cell | NPC(fetal cortex) | GEO      | GSM344813 | GSE13715 |
| 194 | Stem cell | NPC(fetal cortex) | GEO      | GSM344814 | GSE13715 |
| 195 | Stem cell | NPC(fetal cortex) | GEO      | GSM344815 | GSE13715 |
| 196 | Stem cell | NPC(fetal cortex) | GEO      | GSM344816 | GSE13715 |
| 197 | Stem cell | NPC(fetal cortex) | GEO      | GSM344817 | GSE13715 |
| 198 | Stem cell | NPC(fetal cortex) | GEO      | GSM344818 | GSE13715 |
| 199 | Stem cell | NPC(fetal cortex) | GEO      | GSM344820 | GSE13715 |
| 200 | Stem cell | NPC(fetal cortex) | GEO      | GSM344829 | GSE13715 |
| 201 | Stem cell | NPC(fetal cortex) | GEO      | GSM344830 | GSE13715 |
| 202 | Stem cell | NPC(fetal cortex) | GEO      | GSM344831 | GSE13715 |
| 203 | Stem cell | NPC(fetal cortex) | GEO      | GSM344832 | GSE13715 |
| 204 | Stem cell | NPC(fetal cortex) | GEO      | GSM480450 | GSE19345 |
| 205 | Stem cell | NPC(fetal cortex) | GEO      | GSM480451 | GSE19345 |
| 206 | Blood     | Lymphoblast       | in house | N/A       | N/A      |
| 207 | Blood     | Lymphoblast       | in house | N/A       | N/A      |
| 208 | Blood     | Lymphoblast       | in house | N/A       | N/A      |
| 209 | Blood     | Lymphoblast       | in house | N/A       | N/A      |
| 210 | Blood     | Lymphoblast       | in house | N/A       | N/A      |
| 211 | Stem cell | ES                | in house | N/A       | N/A      |
| 212 | Stem cell | iPS cell          | in house | N/A       | N/A      |
| 213 | Stem cell | iPS cell          | in house | N/A       | N/A      |
| 214 | Stem cell | iPS cell          | in house | N/A       | N/A      |
| 215 | Stem cell | iPS cell          | in house | N/A       | N/A      |
| 216 | Stem cell | iPS cell          | in house | N/A       | N/A      |
| 217 | Stem cell | iPS cell          | in house | N/A       | N/A      |
| 218 | Stem cell | iPS cell          | in house | N/A       | N/A      |
| 219 | Stem cell | iPS cell          | in house | N/A       | N/A      |
| 220 | Stem cell | iPS cell          | in house | N/A       | N/A      |

|     |           |             |          |     |     |
|-----|-----------|-------------|----------|-----|-----|
| 221 | Stem cell | iPS cell    | in house | N/A | N/A |
| 222 | Stem cell | iPS cell    | in house | N/A | N/A |
| 223 | Stem cell | NPC(ES/iPS) | in house | N/A | N/A |
| 224 | Stem cell | NPC(ES/iPS) | in house | N/A | N/A |
| 225 | Stem cell | NPC(ES/iPS) | in house | N/A | N/A |
| 226 | Stem cell | NPC(ES/iPS) | in house | N/A | N/A |
| 227 | Stem cell | NPC(ES/iPS) | in house | N/A | N/A |
| 228 | Stem cell | OE cell     | in house | N/A | N/A |
| 229 | Stem cell | OE cell     | in house | N/A | N/A |
| 230 | Stem cell | OE cell     | in house | N/A | N/A |
| 231 | Stem cell | OE cell     | in house | N/A | N/A |
| 232 | Stem cell | OE cell     | in house | N/A | N/A |
| 233 | Stem cell | OE cell     | in house | N/A | N/A |
| 234 | Stem cell | OE cell     | in house | N/A | N/A |
| 235 | Stem cell | OE cell     | in house | N/A | N/A |
| 236 | Stem cell | OE cell     | in house | N/A | N/A |

---
